# Supplementary material for: Homeless Veterans Eligible for Medicaid Under the Affordable Care Act
Source: Atypon-hosted journal article supplement (doi:10.1176/appi.ps.201500377), 2015-10-01
Supplement: appi.ps.201500377.ds001.pdf [file appi.ps.201500377.ds001.pdf]

Appendix 1. Sociodemographic characteristics of homeless veterans by Medicaid eligibility status (N= 114,497)

|                                          | 1) Likely eligible for Medicaid expansion (n= 94,084) | 2) Currently covered by Medicaid (n= 3,831) | 3) Not likely eligible for Medicaid expansion (n= 16,582) | Test of Difference<br>F or X <sup>2</sup> | Difference between groups 1 and 2<br>d or Δ% | Difference between groups 1 and 3<br>d or Δ% |
|------------------------------------------|-------------------------------------------------------|---------------------------------------------|-----------------------------------------------------------|-------------------------------------------|----------------------------------------------|----------------------------------------------|
| Age                                      | 48.79 (10.57)                                         | 50.27 (11.86)                               | 56.48 (14.54)                                             | 3,263.40*                                 | -0.13                                        | <b>-0.60</b>                                 |
| Gender                                   |                                                       |                                             |                                                           |                                           |                                              |                                              |
| Male                                     | 86,153 (92.25%)                                       | 3,233 (84.68%)                              | 15,302 (93.18%)                                           | 319.36*                                   | <b>7.57%</b>                                 | -0.93%                                       |
| Female                                   | 7,236 (7.75%)                                         | 585 (15.32%)                                | 1,120 (6.82%)                                             |                                           | <b>-7.75%</b>                                | 0.93%                                        |
| Race                                     |                                                       |                                             |                                                           |                                           |                                              |                                              |
| White                                    | 49,877 (54.35%)                                       | 1,958 (52.99%)                              | 9,517 (59.38%)                                            | 149.69*                                   | 1.36%                                        | <b>-5.03%</b>                                |
| Black                                    | 38,667 (42.13%)                                       | 1,598 (43.25%)                              | 5,963 (37.21%)                                            |                                           | -0.12%                                       | <b>4.92%</b>                                 |
| Other                                    | 3,228 (3.52%)                                         | 139 (3.77%)                                 | 546 (3.41%)                                               |                                           | -0.25%                                       | 0.11%                                        |
| Married                                  | 10,052 (10.70%)                                       | 517 (13.59%)                                | 1,813 (11.09%)                                            | 32.69*                                    | -2.89%                                       | -0.39%                                       |
| Years of education                       | 12.90 (1.78)                                          | 12.87 (1.93)                                | 13.22 (2.17)                                              | 198.06*                                   | -0.15%                                       | -0.39%                                       |
| VA service-connection for:               |                                                       |                                             |                                                           |                                           |                                              |                                              |
| Psychiatric condition                    | 3,420 (3.66%)                                         | 125 (3.27%)                                 | 2,948 (17.95%)                                            | 5336.68*                                  | 0.39%                                        | <b>-14.29%</b>                               |
| Other condition                          | 11,211 (12.00%)                                       | 463 (12.13%)                                | 3,605 (21.95%)                                            | 1193.39*                                  | -0.13%                                       | <b>-9.95%</b>                                |
| Employment history, past 3 years         |                                                       |                                             |                                                           |                                           |                                              |                                              |
| Employed                                 | 39341 (41.99%)                                        | 1,163 (30.46%)                              | 4,759 (29.10%)                                            | 9,770.07*                                 | <b>11.53%</b>                                | <b>12.89%</b>                                |
| Unemployed                               | 34866 (37.21%)                                        | 1,019 (26.69%)                              | 2,404 (14.70%)                                            |                                           | <b>10.52%</b>                                | <b>22.51%</b>                                |
| Disabled/Retired                         | 19484 (20.80%)                                        | 1,636 (42.85%)                              | 9,191 (56.20%)                                            |                                           | <b>-22.05%</b>                               | <b>-35.4%</b>                                |
| Nights stayed in past month <sup>a</sup> |                                                       |                                             |                                                           |                                           |                                              |                                              |
| Own place                                | 3.50 (9.11)                                           | 5.95 (11.31)                                | 7.44 (12.22)                                              | 1,228.17*                                 | -0.24                                        | -0.37                                        |
| Someone else's place                     | 7.87 (12.15)                                          | 8.19 (12.27)                                | 7.33 (11.94)                                              | 20.72*                                    | -0.03                                        | 0.04                                         |
| Residential/transitional                 | 6.19 (11.26)                                          | 6.54 (11.40)                                | 6.08 (11.13)                                              | 4.13                                      | -0.03                                        | 0.01                                         |

<sup>a</sup>A log transformation was conducted for tests of difference.

|                           |                   |                   |                         |                |              |              |
|---------------------------|-------------------|-------------------|-------------------------|----------------|--------------|--------------|
| Institution               | 5.89 (11.21)      | 1.57 (5.41)       | 3.83 (9.05)             | 408.65*        | <b>0.49</b>  | 0.20         |
| Homeless                  | 6.54 (11.28)      | 7.74 (11.90)      | 5.29 (10.37)            | 118.83*        | -0.10        | 0.12         |
| Chronically homeless      | 31,280 (33.53%)   | 1,393 (36.62%)    | 4,097 (25.25%)          | 463.96*        | -3.09%       | <b>8.28%</b> |
| Any incarceration history | 67,069 (73.29%)   | 2,358 (63.42%)    | 10,198 (64.22%)         | 676.33*        | <b>9.87%</b> | <b>9.07%</b> |
| Total income              | \$384.86 (475.54) | \$687.25 (651.80) | \$1,994.03<br>(2743.16) | 14,117.40<br>* | <b>-0.53</b> | <b>-0.82</b> |

Note: Medium effect size differences ( $d \geq \pm 0.5$  or  $\Delta\% \geq \pm 5\%$ ) are bolded. \* $p < .001$

Appendix 2. Health status of homeless veterans by Medicaid-eligibility status

|                                  | 1) Likely eligible for Medicaid expansion (n= 94,084) | 2) Currently covered by Medicaid (n= 3,831) | 3) Not likely eligible for Medicaid expansion (n= 16,582) | Test of Difference<br>F or X <sup>2</sup> | Difference between groups 1 and 2<br>d or Δ% | Difference between groups 1 and 3<br>d or Δ% |
|----------------------------------|-------------------------------------------------------|---------------------------------------------|-----------------------------------------------------------|-------------------------------------------|----------------------------------------------|----------------------------------------------|
| Rating of physical health        |                                                       |                                             |                                                           |                                           |                                              |                                              |
| Poor                             | 14,717 (15.85%)                                       | 877 (23.13%)                                | 3,038 (18.84%)                                            | 277.35*                                   | <b>-7.28%</b>                                | -2.99%                                       |
| Fair/Good                        | 61,570 (66.30%)                                       | 2,433 (64.16%)                              | 10,604 (65.77%)                                           |                                           | 2.14%                                        | 0.53%                                        |
| Very Good/Excellent              | 16,578 (17.85%)                                       | 482 (12.71%)                                | 2,482 (15.39%)                                            |                                           | <b>5.14%</b>                                 | 2.46%                                        |
| Chronic medical condition        |                                                       |                                             |                                                           |                                           |                                              |                                              |
| HIV/AIDS                         | 1,533 (1.63%)                                         | 109 (2.85%)                                 | 230 (1.39%)                                               | 41.21*                                    | -1.22%                                       | 0.24%                                        |
| Hepatitis C                      | 12,707 (13.52%)                                       | 551 (14.39%)                                | 1,766 (10.66%)                                            | 106.01*                                   | -0.87%                                       | 2.86%                                        |
| Tuberculosis                     | 4,112 (4.37%)                                         | 177 (4.62%)                                 | 702 (4.24%)                                               | 1.27                                      | -0.25%                                       | 0.13%                                        |
| COPD <sup>a</sup>                | 6,751 (7.18%)                                         | 457 (11.93%)                                | 1,718 (10.37%)                                            | 293.10*                                   | <b>-4.75%</b>                                | -3.19%                                       |
| Heart disease                    | 9,100 (9.68%)                                         | 541 (14.13%)                                | 2,780 (16.79%)                                            | 778.65*                                   | <b>-4.45%</b>                                | <b>-7.11%</b>                                |
| Stroke                           | 2,130 (3.16%)                                         | 170 (6.31%)                                 | 699 (6.03%)                                               | 285.20*                                   | -3.15%                                       | -2.87%                                       |
| Diabetes                         | 10,398 (11.06%)                                       | 573 (14.96%)                                | 2,885 (17.42%)                                            | 564.66*                                   | <b>-13.90%</b>                               | <b>-6.36%</b>                                |
| Seizures                         | 4,282 (4.55%)                                         | 278 (7.26%)                                 | 822 (4.96%)                                               | 62.97*                                    | -2.71%                                       | -0.41%                                       |
| Chronic pain                     | 33,691 (35.84%)                                       | 1,782 (46.58%)                              | 6,400 (38.64%)                                            | 217.12*                                   | <b>-10.74%</b>                               | -2.80%                                       |
| Psychiatric diagnoses            |                                                       |                                             |                                                           |                                           |                                              |                                              |
| Affective disorder               | 33,958 (36.09%)                                       | 1,570 (40.98%)                              | 5,632 (33.97%)                                            | 71.29*                                    | <b>-4.89%</b>                                | 2.12%                                        |
| PTSD <sup>b</sup>                | 17,880 (19.00%)                                       | 766 (19.99%)                                | 4,667 (28.15%)                                            | 726.94*                                   | -0.99%                                       | <b>-9.15%</b>                                |
| Other anxiety disorder           | 16,459 (17.49%)                                       | 762 (19.89%)                                | 2,772 (16.72%)                                            | 22.11*                                    | -2.40%                                       | 0.77%                                        |
| Substance use disorder           | 51,631 (54.88%)                                       | 1,851 (48.32%)                              | 7,948 (47.93%)                                            | 318.91*                                   | <b>6.56%</b>                                 | <b>6.95%</b>                                 |
| Psychotic disorder               | 13,143 (13.97%)                                       | 722 (18.85%)                                | 2,639 (15.91%)                                            | 106.36*                                   | <b>-4.88%</b>                                | -1.94%                                       |
| Any psychiatric hospitalizations | 31,401 (33.87%)                                       | 1,388 (36.81%)                              | 6,182 (38.47%)                                            | 136.21*                                   | -2.94%                                       | <b>-4.60%</b>                                |

Note: Notable differences (Δ% ≥ ±5%) are bolded. \*p<.001

<sup>a</sup> COPD= Chronic obstructive pulmonary disease

<sup>b</sup>PTSD= Posttraumatic stress disorder
